# Supplementary material
Source: publisher figshare collection journal article supplement (https://acs.figshare.com/ndownloader/files/5187484)
Supplement: Supplementary file 1 [file 5187484]

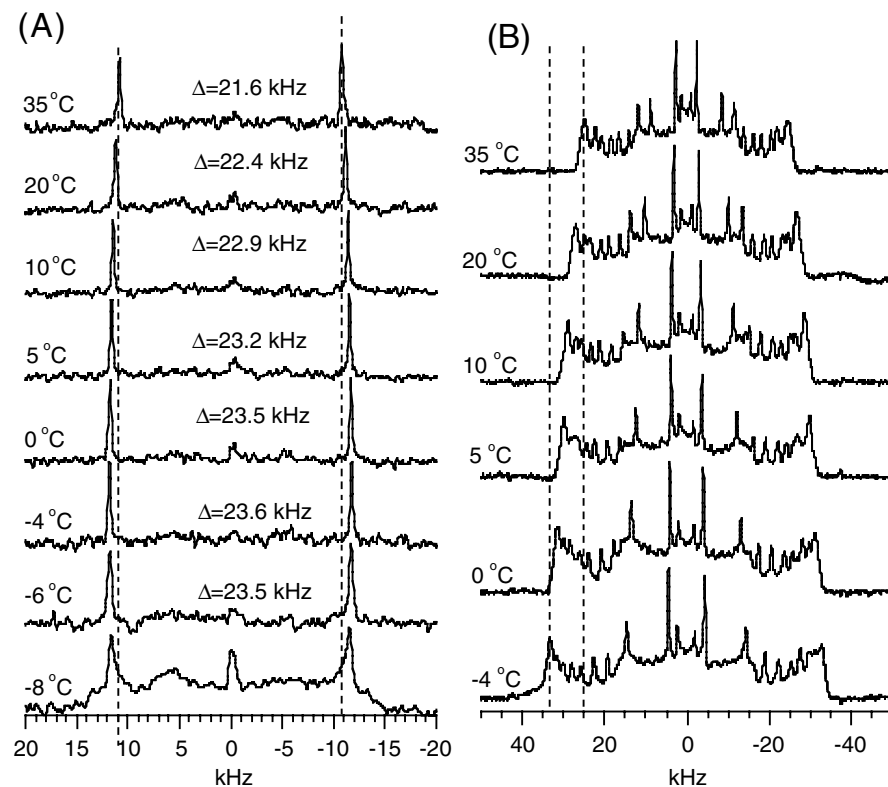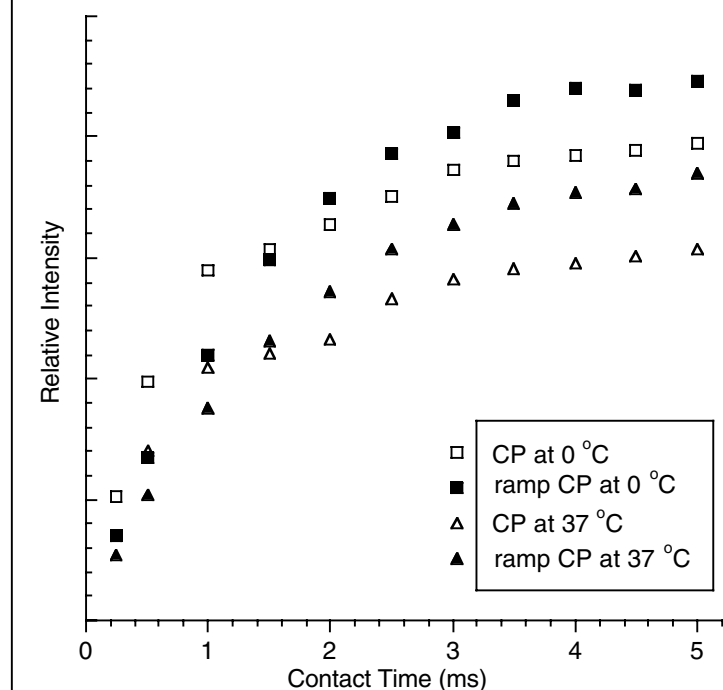

Figure (A) and (B) are the  $^{14}\text{N}$  and  $^2\text{H}$  quadrupole coupling spectra of mechanically aligned POPC bilayers as a function of temperature. Figure (C) is the  $^{31}\text{P}$  signal intensity as a function of the CP contact time.
